# Supplementary material for: Structural, optical and photoconductivity characteristics of pristine FeO·Fe2O3 and NTPI–FeO·Fe2O3 nanocomposite: aggregation induced emission enhancement of fluorescent organic nanoprobe of thiophene appended phenanthrimidazole derivative
Source: Royal Society of Chemistry journal article supplement (doi:10.1039/c5ra25545g), 2016-01-01
Supplement: c5ra25545g1.pdf [file c5ra25545g1.pdf]

## ELECTRONIC SUPPLEMENTARY INFORMATION

**Structural, optical and photoconductivity characteristics of pristine FeO.Fe<sub>2</sub>O<sub>3</sub> and NTPI- FeO.Fe<sub>2</sub>O<sub>3</sub> nanocomposite : Aggregation induced emission enhancement of fluorescent organic nanoprobe of thiophene appended phenanthrimidazole derivative**

**Jayaraman Jayabharathi\*, Annadurai Prabhakaran, Chockalingam Karunakaran, Venugopal Thanikachalam, Munusamy Sundharesan**

*Department of Chemistry, Annamalai University, Annamalainagar 608 002, Tamilnadu, India*

\* Address for correspondence

Dr. J. Jayabharathi  
Professor of Chemistry  
Department of Chemistry  
Annamalai University  
Annamalainagar 608 002  
Tamilnadu, India.  
Tel: +91 9443940735  
E-mail: jtchalam2005@yahoo.

---

\* Corresponding author. Tel.: +91 9443940735  
*E-mail address:* jtchalam2005@yahoo.co.in

**Table S1.** Mulliken atomic charges of imidazole and NTPI–FeO clusters

| S. No. | NTPI  |                | NTPI – Fe <sub>3</sub> O |                | NTPI - Fe <sub>3</sub> O <sub>2</sub> |                | Fe <sub>3</sub> O |                | Fe <sub>3</sub> O <sub>2</sub> |                |
|--------|-------|----------------|--------------------------|----------------|---------------------------------------|----------------|-------------------|----------------|--------------------------------|----------------|
|        | Atoms | Atomic charges | Atoms                    | Atomic charges | Atoms                                 | Atomic charges | Atoms             | Atomic charges | Atoms                          | Atomic charges |
| 1      | C     | -0.165846      | C                        | -0.356634      | C                                     | -0.358075      | Fe                | 0.201842       | Fe                             | 0.295833       |
| 2      | C     | -0.020017      | C                        | -0.190746      | C                                     | -0.192971      | Fe                | 0.201842       | Fe                             | 0.35550        |
| 3      | C     | 0.091927       | C                        | 0.290008       | C                                     | 0.293930       | Fe                | 0.133372       | Fe                             | 0.295264       |
| 4      | C     | 0.054434       | C                        | 0.230049       | C                                     | 0.229985       | O                 | -0.537056      | O                              | -0.473185      |
| 5      | C     | -0.164052      | C                        | -0.392355      | C                                     | -0.393260      | -                 | -              | O                              | -0.473462      |
| 6      | C     | -0.123220      | C                        | -0.273607      | C                                     | -0.275235      | -                 | -              | -                              | -              |
| 7      | C     | 0.076139       | C                        | -0.168760      | C                                     | -0.171854      | -                 | -              | -                              | -              |
| 8      | C     | 0.056737       | C                        | 0.239887       | C                                     | 0.242327       | -                 | -              | -                              | -              |
| 9      | C     | 0.054156       | C                        | 0.375230       | C                                     | 0.346743       | -                 | -              | -                              | -              |
| 10     | C     | 0.043543       | C                        | 0.185252       | C                                     | -0.173750      | -                 | -              | -                              | -              |
| 11     | C     | -0.118636      | C                        | -0.379689      | C                                     | -0.334825      | -                 | -              | -                              | -              |
| 12     | C     | -0.136509      | C                        | -0.248757      | C                                     | -0.257757      | -                 | -              | -                              | -              |
| 13     | C     | -0.122520      | C                        | -0.275214      | C                                     | -0.277936      | -                 | -              | -                              | -              |
| 14     | C     | -0.167788      | C                        | -0.378910      | C                                     | -0.382422      | -                 | -              | -                              | -              |
| 15     | N     | -0.458478      | N                        | -0.243153      | N                                     | -0.245643      | -                 | -              | -                              | -              |
| 16     | H     | 0.160180       | C                        | 0.211610       | C                                     | 0.2032292      | -                 | -              | -                              | -              |
| 17     | H     | 0.118590       | N                        | -0.188467      | N                                     | -0.142357      | -                 | -              | -                              | -              |
| 18     | H     | 0.085122       | H                        | 0.269848       | H                                     | 0.282498       | -                 | -              | -                              | -              |
| 19     | H     | 0.134020       | H                        | 0.237376       | H                                     | 0.236218       | -                 | -              | -                              | -              |
| 20     | H     | 0.116408       | H                        | 0.183247       | H                                     | 0.183053       | -                 | -              | -                              | -              |
| 21     | H     | 0.119096       | H                        | 0.245027       | H                                     | 0.244682       | -                 | -              | -                              | -              |

|    |   |           |   |           |   |           |   |   |   |   |
|----|---|-----------|---|-----------|---|-----------|---|---|---|---|
| 22 | H | 0.117207  | H | 0.235671  | H | 0.234246  | - | - | - | - |
| 23 | H | 0.133285  | H | 0.239881  | H | 0.229799  | - | - | - | - |
| 24 | C | 0.123205  | H | 0.237846  | H | 0.234774  | - | - | - | - |
| 25 | C | -0.042711 | H | 0.243137  | H | 0.241249  | - | - | - | - |
| 26 | C | -0.093889 | C | 0.214015  | C | 0.212934  | - | - | - | - |
| 27 | C | -0.192817 | C | 0.090784  | C | 0.089290  | - | - | - | - |
| 28 | C | 0.100219  | C | -0.276006 | C | -0.275773 | - | - | - | - |
| 29 | C | -0.141056 | C | -0.375372 | C | -0.376900 | - | - | - | - |
| 30 | H | 0.158321  | C | 0.482809  | C | -0.483317 | - | - | - | - |
| 31 | C | -0.097245 | C | -0.260571 | C | -0.260593 | - | - | - | - |
| 32 | H | 0.175541  | H | 0.263846  | H | 0.268883  | - | - | - | - |
| 33 | C | -0.157033 | C | -0.240854 | C | -0.241581 | - | - | - | - |
| 34 | C | -0.138355 | H | 0.313446  | H | 0.313469  | - | - | - | - |
| 35 | H | 0.133856  | C | -0.465817 | C | -0.466382 | - | - | - | - |
| 36 | C | -0.127776 | C | -0.469669 | C | -0.470986 | - | - | - | - |
| 37 | H | 0.131874  | H | 0.238577  | H | 0.238545  | - | - | - | - |
| 38 | H | 0.132801  | C | -0.237363 | C | -0.238545 | - | - | - | - |
| 39 | H | 0.132802  | H | 0.240892  | H | -0.239661 | - | - | - | - |
| 40 | H | 0.127472  | H | 0.245202  | H | 0.244413  | - | - | - | - |
| 41 | C | -0.56855  | H | 0.247783  | H | 0.246819  | - | - | - | - |
| 42 | C | 0.045418  | H | 0.236084  | H | 0.234969  | - | - | - | - |
| 43 | C | -0.159111 | C | -0.179484 | C | -0.205901 | - | - | - | - |
| 44 | H | 0.1525570 | C | -0.322126 | C | -0.328059 | - | - | - | - |
| 45 | C | -0.450263 | C | -0.224671 | C | -0.229920 | - | - | - | - |
| 46 | H | 0.135959  | H | 0.275906  | H | 0.275068  | - | - | - | - |
| 47 | H | 0.211524  | C | -0.534165 | C | -0.548426 | - | - | - | - |
| 48 | S | 0.531206  | H | 0.255784  | H | 0.253765  | - | - | - | - |

|    |   |   |    |           |    |           |   |   |   |   |
|----|---|---|----|-----------|----|-----------|---|---|---|---|
| 49 |   |   | H  | 0.301850  | H  | 0.298433  | - | - | - | - |
| 50 | - | - | S  | 0.438568  | S  | 0.488043  | - | - | - | - |
| 51 | - | - | Fe | 0.0151939 | Fe | 0.238848  | - | - | - | - |
| 52 | - | - | Fe | 0.052177  | Fe | 0.030576  | - | - | - | - |
| 53 | - | - | Fe | 0.107875  | Fe | 0.409408  | - | - | - | - |
| 54 | - | - | O  | -0.528712 | O  | -0.509375 | - | - | - | - |
| 55 | - | - | -  | -         | O  | -0.410890 | - | - | - | - |

| S. No. | Fe <sub>3</sub> O <sub>3</sub> |                | Fe <sub>4</sub> O |                | Fe <sub>4</sub> O <sub>2</sub> |                | Fe <sub>4</sub> O <sub>3</sub> |                | Fe <sub>4</sub> O <sub>4</sub> |                |
|--------|--------------------------------|----------------|-------------------|----------------|--------------------------------|----------------|--------------------------------|----------------|--------------------------------|----------------|
|        | Atoms                          | Atomic charges | Atoms             | Atomic charges | Atoms                          | Atomic charges | Atoms                          | Atomic charges | Atoms                          | Atomic charges |
| 1      | Fe                             | 0.440286       | Fe                | 0.144470       | Fe                             | 0.373271       | Fe                             | 0.339690       | Fe                             | 0.290203       |
| 2      | Fe                             | 0.435227       | Fe                | 0.187534       | Fe                             | 0.193631       | Fe                             | 0.335945       | Fe                             | 0.398816       |
| 3      | Fe                             | 0.43980        | Fe                | -0.506458      | O                              | -0.480634      | O                              | -0.466934      | O                              | -0.423475      |
| 4      | O                              | -0.437237      | Fe                | 0.096910       | Fe                             | 0.195597       | Fe                             | 0.251163       | Fe                             | 0.464195       |
| 5      | O                              | -0.437889      | O                 | 0.077544       | Fe                             | 0.122972       | Fe                             | 0.294147       | Fe                             | 0.451254       |
| 6      | O                              | -0.440206      |                   | -              | O                              | -0.404842      | O                              | -0.396407      | O                              | -0.369995      |
| 7      | -                              | -              | -                 | -              | -                              | -              | O                              | -0.357603      | O                              | -0.366521      |
| 8      | -                              | -              | -                 | -              | -                              | -              | -                              | -              | O                              | -0.444478      |

**Figure S1.** LC- Mass spectrum of NTPI –FeO.Fe<sub>2</sub>O<sub>3</sub> composite

**Figure S2.** Photographs of enhancement of nanoaggregates of NTPI with Fe<sup>3+</sup> ion (a) Test strip ; (b) 10<sup>-3</sup> M Fe<sup>3+</sup> ; (c) 10<sup>-5</sup> M Fe<sup>3+</sup> ; (d) 10<sup>-7</sup> M Fe<sup>3+</sup> ; e) 10<sup>-8</sup> M Fe<sup>3+</sup>

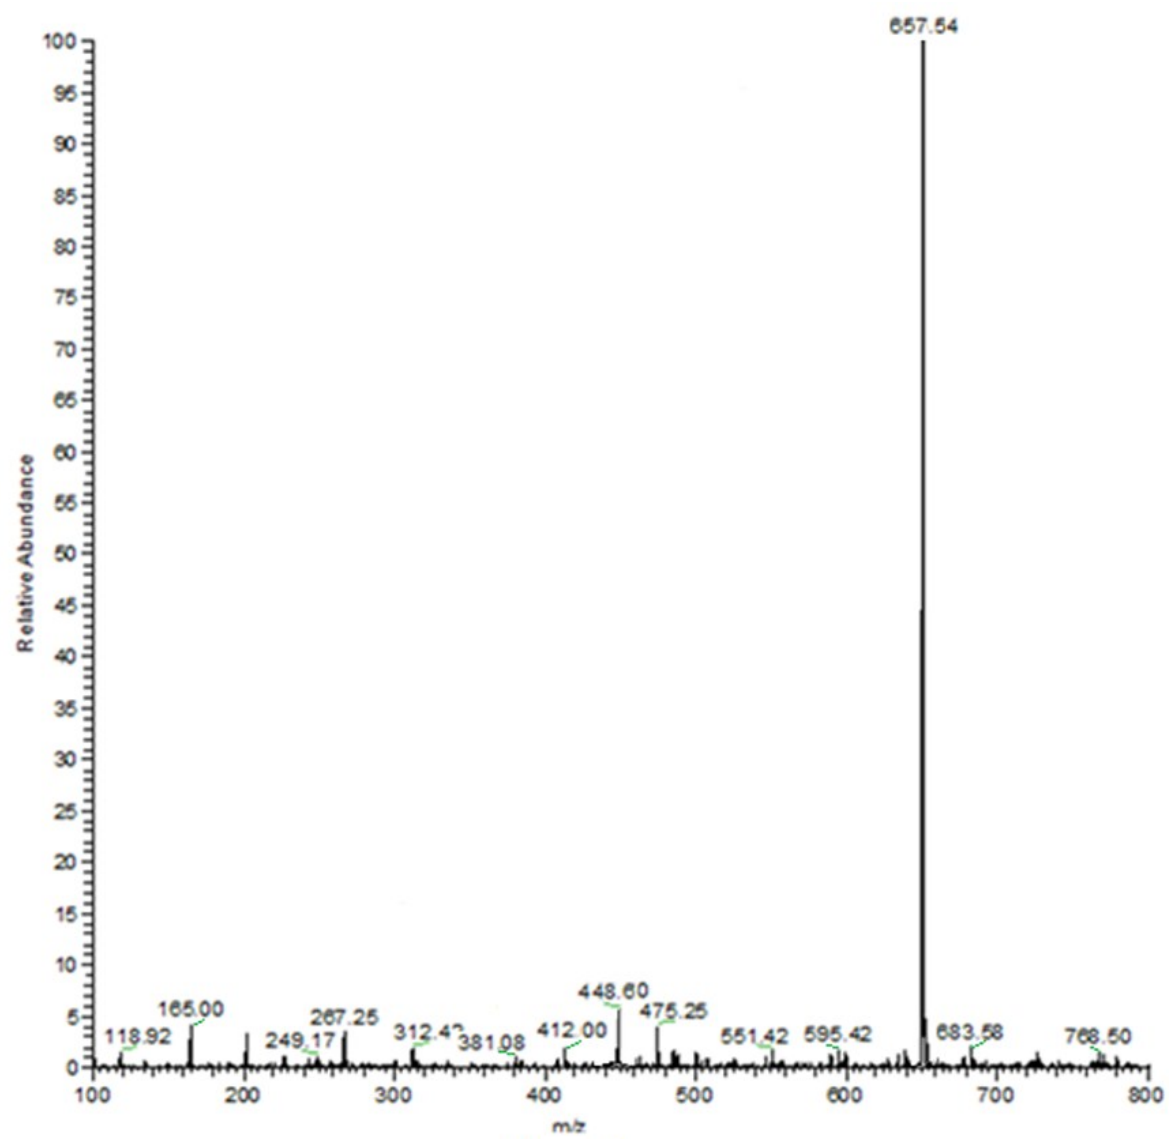

Figure S1

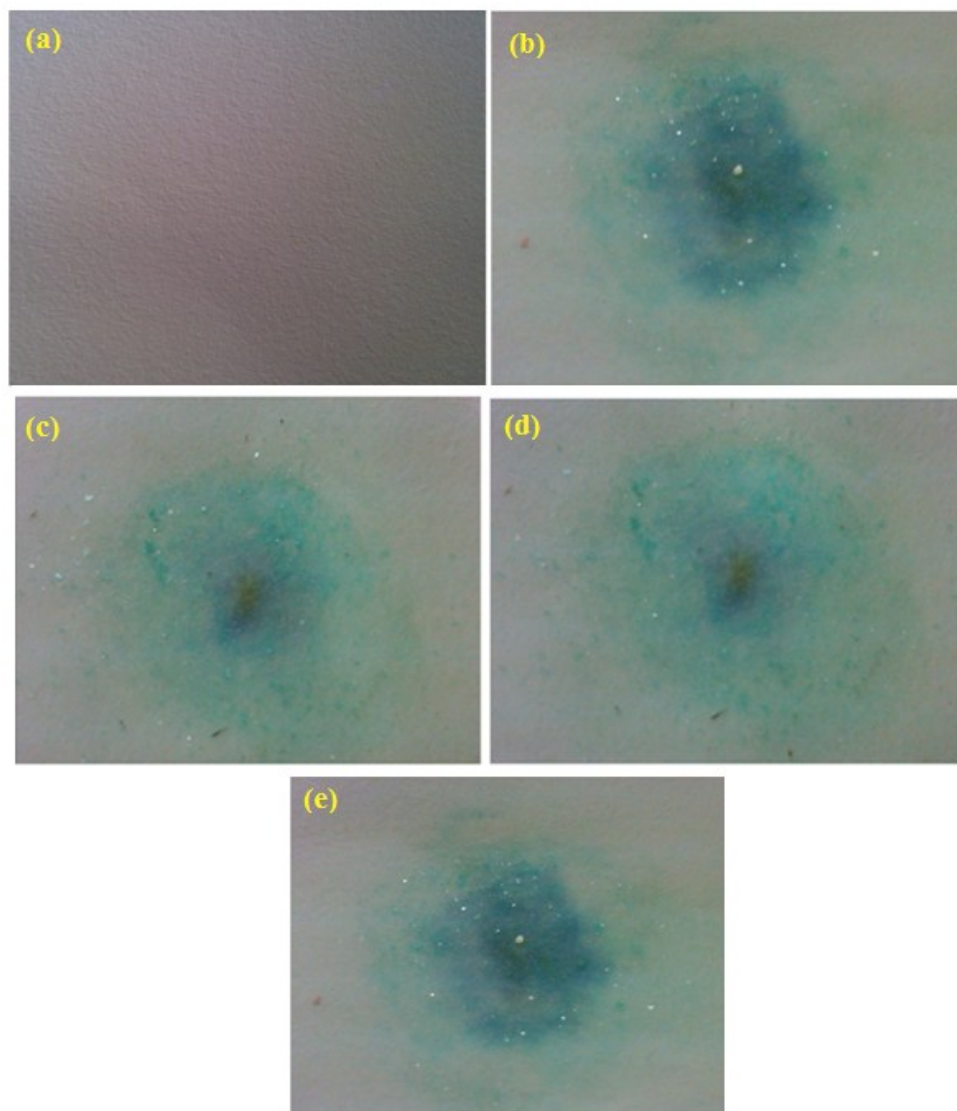

**Figure S2**
